# Supplementary material for: Expression analysis of vitellogenins in the workers of the red imported fire ant (Solenopsis invicta)
Source: PeerJ. 2018 May 28;6:e4875. doi: 10.7717/peerj.4875 (PMC5978388; doi:10.7717/peerj.4875)
Supplement: Supplemental Information 1 — Each page contain the raw and analyzed qPCR data for each Vg gene in minor, medium and major carbohydrate fire ant foragers. [file peerj-06-4875-s001.xlsx]

## Sheet: Vg1
Gene	Sample	Rep	CT	Ave CT	Control	Sample	CT	Ave CT
Vg1	MIN	1	20.2989		RPL18	MIN	23.353
Vg1	MIN	1	20.4711		RPL18	MIN	23.2178							MIN	MED	MAJ
				20.385	RPL18	MIN	23.1543	23.2417	2.8567	-0.858657	0.551466		Rep1	0.551466	0.692657	4.18591
Vg1	MED	1	19.8135		RPL18	MED	22.0556						Rep2	1.21615	3.10928	5.27404
Vg1	MED	1	19.6518		RPL18	MED	21.9875						Rep3	0.990806	3.01914	6.00613
Vg1	MED	1	19.7282	19.7311	RPL18	MED	22.131	22.0581	2.32692	-0.529787	0.692657		Rep 4	1.67334	0.633923	5.83669
Vg1	MAJ	1	18.226		RPL18	MAJ	23.6048						Rep 5	0.899339	0.880826	3.35086
Vg1	MAJ	1	18.2822		RPL18	MAJ	22.9691						Ave	1.06622	1.66716	4.93073
Vg1	MAJ	1	18.8019	18.4367	RPL18	MAJ	23.5029	23.3589	4.92225	2.06554	4.18591		Std dev	0.415204	1.27897	1.13422
													Std error	0.185685	0.571975	0.507241
Vg1	MIN	2	24.2826		RPL18	MIN1	28.138
Vg1	MIN	2	24.3649	24.3238	RPL18	MIN1	28.5048	28.3214	3.99768	0.282319	1.21615
Vg1	MED	2	22.6021		RPL18	MED1	28.1613
Vg1	MED	2	22.6361	22.6191	RPL18	MED1	28.3454	28.2533	5.63426	1.63658	3.10928
Vg1	MAJ	2	22.0218		RPL18	MAJ1	28.4753
Vg1	MAJ	2	22.083	22.0524	RPL18	MAJ1	28.4227	28.449	6.39659	2.39891	5.27404
Vg1	MIN	3	21.2256		RPL18	MIN2	25.0707
Vg1	MIN	3	21.4295	21.3276	RPL18	MIN2	24.9885	25.0296	3.70204	-0.0133261	0.990806
Vg1	MED	3	20.1427		RPL18	MED2	25.4604
Vg1	MED	3	20.1883	20.1655	RPL18	MED2	25.463	25.4617	5.29617	1.59414	3.01914
Vg1	MAJ	3	19.5474		RPL18	MAJ2	25.7207
Vg1	MAJ	3	19.5825	19.565	RPL18	MAJ2	25.9862	25.8534	6.28847	2.58643	6.00613
Vg1
Vg1	MIN	4	20.208		RP18	MIN	24.8172
Vg1	MIN	4	20.1934	20.2007	RP18	MIN	24.5004	24.6588	4.45809	0.742727	1.67334
Vg1	MED	4	20.4784		RP18	MED	24.6301
Vg1	MED	4	20.9567	20.7176	RP18	MED	24.4059	24.518	3.80047	-0.65762	0.633923
Vg1	MAJ	4	17.1292		RP18	MAJ	24.211
Vg1	MAJ	4	17.0776	17.1034	RP18	MAJ	24.0023	24.1067	7.00324	2.54515	5.83669
Vg1	MIN	5	20.6136		RPL18	MIN	24.1905
Vg1	MIN	5	20.6028	20.6082	RPL18	MIN	24.1505	24.1705	3.5623	-0.153062	0.899339
Vg1	MED	5	21.7255		RPL18	MED	25.0973
Vg1	MED	5	21.7702	21.7478	RPL18	MED	25.1569	25.1271	3.37923	-0.183071	0.880826
Vg1	MAJ	5	19.1295		RPL18	MAJ	24.6622
Vg1	MAJ	5	19.4088	19.2691	RPL18	MAJ	24.4897	24.576	5.30683	1.74453	3.35086
															Column1	Column2	Column3	Column4	Column5	Column6
															Source	DF	Sum of Squares	Mean Square	F Ratio	Prob > F
								Ave min	3.71536						Column 1	2	43.2879	21.6439	20.9384	0.0001
															Error	12	12.4043	1.0337
															C. Total	14	55.6922
															Level			Mean
															Maj	A		4.932
															Med		B	1.666
															Min		B	1.066

## Sheet: Vg2
Gene	Sample	Rep	CT	CT Mean	Control	Sample	CT
Vg2	MIN	1	27.9911		RP18	MIN	23.353							MIN	MED	MAJ
Vg2	MIN	1	27.7653		RP18	MIN	23.2178						Rep 1	0.490393	2.97095	6.05925
Vg2	MIN	1	28.1356	27.964	RP18	MIN	23.1543	23.2417	-4.72228	-1.02799	0.490393		Rep 2	0.989022	2.15115	1.99603
Vg2	MED	1	25.3142		RP18	MED	22.0556						Rep 3	0.958793	1.7469	2.595
Vg2	MED	1	25.101		RP18	MED	21.9875						Rep 4	1.34066	2.29073	5.23223
Vg2	MED	1	25.2131	25.2094	RP18	MED	22.131	22.0581	-3.15136	1.57093	2.97095		Rep 5	0.68168	3.97561	5.66301		4.83024
Vg2	MAJ	1	25.5929		RP18	MAJ	23.6048						Ave	0.89211	2.62707	4.3091
Vg2	MAJ	1	25.418		RP18	MAJ	22.9691						Std Dev	0.324304	0.873374	1.87328
Vg2	MAJ	1	25.4353	25.4821	RP18	MAJ	23.5029	23.3589	-2.12315	2.59914	6.05925		Std error	0.145033	0.390585	0.837755
Vg2
Vg2	MIN1	2	31.3678		RP18	MIN1	28.138
Vg2	MIN1	2	32.6955	32.0317	RP18	MIN1	28.5048	28.3214	-3.71022	-0.015925	0.989022
Vg2	MED1	2	30.802		RP18	MED1	28.1613
Vg2	MED1	2	30.9149	30.8585	RP18	MED1	28.3454	28.2533	-2.60511	1.10511	2.15115
Vg2	MAJ1	2	31.2204		RP18	MAJ1	28.4753
Vg2	MAJ1	2	31.1038	31.1621	RP18	MAJ1	28.4227	28.449	-2.71309	0.997131	1.99603
Vg2	MIN1	3	28.6831		RP18	MIN1	25.0707
Vg2	MIN1	3	28.8861	28.7846	RP18	MIN1	24.9885	25.0296	-3.755	-0.0607085	0.958793
Vg2	MED1	3	28.4179		RP18	MED1	25.4604
Vg2	MED1	3	28.4059	28.4119	RP18	MED1	25.463	25.4617	-2.9502	0.804798	1.7469
Vg2	MAJ1	3	28.0417		RP18	MAJ1	25.7207
Vg2	MAJ1	3	28.4237	28.2327	RP18	MAJ1	25.9862	25.8534	-2.37927	1.37574	2.595
Vg2	MIN	4	27.5184		RP18	MIN1	24.19
Vg2	MIN	4	27.2826	27.4005	RP18	MIN1	24.0683	24.1291	-3.27135	0.422943	1.34066
Vg2	MED	4	28.5803		RP18	MED1	26.6606
Vg2	MED	4	28.9851	28.7827	RP18	MED1	26.7537	26.7072	-2.07554	1.19581	2.29073
Vg2	MAJ	4	25.7056		RP18	MAJ1	24.9208
Vg2	MAJ	4	25.8761	25.7909	RP18	MAJ1	24.8931	24.907	-0.883925	2.38743	5.23223
Vg2	MIN1	5	27.2023		RPL18	MIN	24.1905
Vg2	MIN1	5	27.164	27.1831	RPL18	MIN	24.1505	24.1705	-3.01261	-3.01261	0.68168
Vg2	MED1	5	27.7756		RPL18	MED	25.0973							Column1	Column2	Column3	Column4	Column5	Column6
Vg2	MED1	5	27.9412	27.8584	RPL18	MED	25.1569	25.1271	-2.7313	0.281314	3.97561			Source	DF	Sum of Squares	Mean Square	F Ratio	Prob > F
Vg2	MAJ1	5	25.5355		RPL18	MAJ	24.6622							Column 1	2	29.2092	14.6046	10.0309	0.0027
Vg2	MAJ1	5	25.7042	25.6199	RPL18	MAJ	24.4897	24.576	-1.0439	1.96871	5.66301			Error	12	17.4716	1.456
														C. Total	14	46.6808
								Ave min	-3.69429
														Level			Mean
														Maj	A		4.31
														Med	A	B	2.628
														Min		B	0.892

## Sheet: Vg3
Gene	Sample	Rep	CT	CT mean	Control	Sample	CT	CT mean
Vg3	MIN	1	29.1397		RP18	MIN1	23.353
Vg3	MIN	1	29.044	29.0919	RP18	MIN1	23.2178	23.2854	-5.80646	-0.51317	0.700681			MIN	MED	MAJ
Vg3	MED	1	29.6018		RP18	MED1	22.0556						Rep1	0.700681	0.31991	0.399018
Vg3	MED	1	29.3428	29.4723	RP18	MED1	21.9875	22.0216	-7.45073	-1.64426	0.31991		Rep2	1.62477	2.27542	2.55591
Vg3	MAJ	1	30.3425		RP18	MAJ1	23.6048						Rep3	1.53981	1.40189	1.47026
Vg3	MAJ	1	30.4953	30.4189	RP18	MAJ1	22.9691	23.287	-7.13194	-1.32548	0.399018		Rep4	1.01282	1.0803	0.888226
													Rep 5	0.56323	0.856228	1.21333
Vg3	MIN	2	32.8478		RP18	MIN1	28.138
Vg3	MIN	2	32.9812	32.9145	RP18	MIN1	28.5048	28.3214	-4.59306	0.700239	1.62477		Ave	1.08826	1.18675	1.30535
Vg3	MED	2	31.9632		RP18	MED1	28.1613						Std Dev	0.480445	0.725168	0.80545
Vg3	MED	2	31.3574	31.6603	RP18	MED1	28.3454	28.2533	-3.40692	1.18613	2.27542		Stderr	0.214862	0.324305	0.360208
Vg3	MAJ	2	31.7565		RP18	MAJ1	28.4753
Vg3	MAJ	2	31.6199	31.6882	RP18	MAJ1	28.4227	28.449	-3.23922	1.35384	2.55591
Vg3	MIN1	3	32.9982		RP18	MIN1	28.138
Vg3	MIN1	3	32.9858	32.992	RP18	MIN1	28.5048	28.3214	-4.67054	0.622753	1.53981
Vg3	MED1	3	32.508		RP18	MED1	28.1613
Vg3	MED1	3	32.365	32.4365	RP18	MED1	28.3454	28.2533	-4.18317	0.487375	1.40189
Vg3	MAJ1	3	32.7137		RP18	MAJ1	28.4753
Vg3	MAJ1	3	32.4132	32.5635	RP18	MAJ1	28.4227	28.449	-4.11447	0.556075	1.47026
Vg3	MIN2	4	30.3271		RP18	MIN2	25.0707
Vg3	MIN2	4	30.282	30.3045	RP18	MIN2	24.9885	25.0296	-5.27491	0.0183833	1.01282
Vg3	MED2	4	30.4436		RP18	MED2	25.4604
Vg3	MED2	4	30.8067	30.6252	RP18	MED2	25.463	25.4617	-5.16348	0.111435	1.0803
Vg3	MAJ2	4	30.9133		RP18	MAJ2	25.7207
Vg3	MAJ2	4	31.6854	31.2993	RP18	MAJ2	25.9862	25.8534	-5.44591	-0.171001	0.888226
Vg3	MIN	5	30.24		RPL18	MIN	24.1905
Vg3	MIN	5	30.344	30.292	RPL18	MIN	24.1505	24.1705	-6.1215	-0.828205	0.56323
Vg3	MED	5	31.602		RPL18	MED	25.0973
Vg3	MED	5	31.343	31.4725	RPL18	MED	25.1569	25.1271	-6.34543	-0.223933	0.856228
Vg3	MAJ	5	30.342		RPL18	MAJ	24.6622
Vg3	MAJ	5	30.495	30.4185	RPL18	MAJ	24.4897	24.576	-5.84253	0.278969	1.21333
														Column1	Column2	Column3	Column4	Column5	Column6
														Source	DF	Sum of Squares	Mean Square	F Ratio	Prob > F
														Column 1	2	0.121213	0.060607	0.1291	0.8801
														Error	12	5.63532	0.46961
														C. Total	14	5.75653
								Ave con	-5.29329
														Level		Mean
														Maj	A	1.33
														Med	A	1.27
														Min	A	1.0575
Vg3	MIN		29.0191		RP18	MIN3	20.1905
Vg3	MIN		29.0594	29.0392	RP18	MIN3	20.1505	20.1705
Vg3	MED		31.2966		RP18	MED3	27.0973
Vg3	MED		31.1006	31.1986	RP18	MED3	27.1569	27.1271
Vg3	MAJ		29.7403		RP18	MAJ3	21.6622
Vg3	MAJ		29.7444	29.7424	RP18	MAJ3	21.4897	21.576
Vg3	MIN		34.3901		RP18	MIN3	27.7675
Vg3	MIN		34.0329	34.2115	RP18	MIN3	28.1637	27.9656
Vg3	MED		30.7936		RP18	MED3	22.3062
Vg3	MED		30.3494	30.5715	RP18	MED3	22.4571	22.3817
Vg3	MAJ		29.0205		RP18	MAJ3	20.5317
	MAJ			29.0205	RP18	MAJ3	21.7054	21.1185

## Sheet: Vg4
Gene	Sample	Rep	CT	CT mean	Control	Sample	CT	CT mean
														MIN	MED	MAJ
													Rep 1	0.78903	2.54832	1.76631
													Rep 2	0.993498	3.01793	3.23412
													Rep 3	0.728129	0.672021	2.76296
													Rep 4	1.04504	1.09319	1.09132
													Rep 5	1.67648	1.03635	0.932632
													Ave	1.04644	1.67356	1.95747
													Std Dev	0.376609	1.03905	1.01436
													SEM	0.168425	0.464677	0.453635
Vg4	MIN	1	27.9668		RP18	MIN	28.138
Vg4	MIN	1	27.984	27.9754	RP18	MIN	28.5048	28.3214	0.346044	-0.341847	0.78903
Vg4	MED	1	26.6564		RP18	MED	28.1613
Vg4	MED	1	26.4591	26.5578	RP18	MED	28.3454	28.2533	1.69559	1.34955	2.54832
Vg4	MAJ	1	27.3431		RP18	MAJ	28.4753
Vg4	MAJ	1	27.2214	27.2822	RP18	MAJ	28.4227	28.449	1.16678	0.820735	1.76631
					RP18
Vg4	MIN	2	24.2969		RP18	MIN	25.0707
Vg4	MIN	2	24.4053	24.3511	RP18	MIN	24.9885	25.0296	0.67848	-0.00941162	0.993498
Vg4	MED	2	23.1406		RP18	MED	25.4604
Vg4	MED	2	23.2387	23.1897	RP18	MED	25.463	25.4617	2.27204	1.59356	3.01793
Vg4	MAJ	2	23.4276		RP18	MAJ	25.7207
Vg4	MAJ	2	23.5356	23.4816	RP18	MAJ	25.9862	25.8534	2.37185	1.69337	3.23412
Vg4	MIN	3	23.9606		RP18	MIN1	24.19
Vg4	MIN	3	23.8374	23.899	RP18	MIN1	24.0683	24.1291	0.230157	-0.457735	0.728129
Vg4	MED	3	27.1003		RP18	MED1	26.6606
Vg4	MED	3	27.0005	27.0504	RP18	MED1	26.7537	26.7072	-0.343265	-0.573422	0.672021
Vg4	MAJ	3	23.214		RP18	MAJ1	24.9208
Vg4	MAJ	3	23.2072	23.2106	RP18	MAJ1	24.8931	24.907	1.69637	1.46622	2.76296
Vg4	MIN	4	23.866		RP18	MIN	24.8172
Vg4	MIN	4	23.9487	23.9073	RP18	MIN	24.5004	24.6588	0.751449	0.0635577	1.04504
Vg4	MED	4	23.3893		RP18	MED	24.6301
Vg4	MED	4	23.8868	23.638	RP18	MED	24.4059	24.518	0.879989	0.128539	1.09319
Vg4	MAJ	4	23.2692		RP18	MAJ	24.211
Vg4	MAJ	4	23.189	23.2291	RP18	MAJ	24.0023	24.1067	0.877529	0.126079	1.09132
Vg4	MIN	5	22.9346		RPL18	MIN	24.1905
Vg4	MIN	5	22.5397	22.7372	RPL18	MIN	24.1505	24.1705	1.43333	0.745436	1.67648
Vg4	MED	5	23.6411		RPL18	MED	25.0973
Vg4	MED	5	23.6434	23.6422	RPL18	MED	25.1569	25.1271	1.48484	0.0515083	1.03635
Vg4	MAJ	5	23.1799		RPL18	MAJ	24.6622
Vg4	MAJ	5	23.3067	23.2433	RPL18	MAJ	24.4897	24.576	1.33271	-0.10062	0.932632
														Column1	Column2	Column3	Column4	Column5	Column6
							ave con	0.687892						Source	DF	Sum of Squares	Mean Square	F Ratio	Prob > F
														Column 1	2	2.17387	1.08693	1.4491	0.2731
														Error	12	9.00108	0.75009
														C. Total	14	11.1749
