# Supplementary material for: Expression analysis of vitellogenins in the workers of the red imported fire ant (Solenopsis invicta)
Source: PeerJ. 2018 May 28;6:e4875. doi: 10.7717/peerj.4875 (PMC5978388; doi:10.7717/peerj.4875)
Supplement: Supplemental Information 2 — Each page contain the raw and analyzed qPCR data for each Vg gene in different task allocated fire ant workers. [file peerj-06-4875-s002.xlsx]

## Sheet: Vg1
Gene	Sample	Rep	Ct	Ct Ave							Ave Carb	3.57971
Vg1	Carb	1	18.6033		RP18	C	1	21.882								Carb	Pro	Nur
Vg1	Carb	1	18.3716	18.4874	RP18	C	1	21.6639	21.773	3.28555	-0.294157	0.815549			Rep 1	0.815549	0.868076	0.44254
Vg1	Pro	1	19.0634		RP18	P	1	22.187							Rep 2	1.05101	0.70166	0.631158		Source	DF	Sum of Squares	Mean Square	F Ratio	Prob > F
Vg1	Pro	1	19.0284	19.0459	RP18	P	1	22.0677	22.1274	3.08145	-0.204107	0.868076			Rep 3	1.17065	0.505412	0.628587		Column 1	2	0.934893	0.467447	14.9074	0.0006		Level			Mean
Vg1	Nur	1	17.9212		RP18	N	1	20.0259							Rep 4	0.996591	0.501009	0.143946		Error	12	0.37628	0.031357				Carb	A		1.012
Vg1	Nur	1	17.9004	17.9108	RP18	N	1	20.0145	20.0202	2.10944	-1.17612	0.44254			Rep 5	1.02342	0.613241	0.185894		C. Total	14	1.31117					Pro		B	0.638
															Ave	1.01144	0.63788	0.406425									Nur		B	0.406
															Std Dev	0.128112	0.153253	0.233824
Vg1	Carb	2	21.5217		RP18	Carb	2	25.0775							Std Error	0.0572936	0.068537	0.104569
Vg1	Carb	2	21.2118	21.3667	RP18	Carb	2	24.9589	25.0182	3.65148	0.0717717	1.05101
Vg1	Pro	2	20.1265		RP18	Pro	2	23.2306
Vg1	Pro	2	20.0251	20.0758	RP18	Pro	2	23.2016	23.2161	3.14033	-0.511157	0.70166
Vg1	Nur	2	21.7509		RP18	Nur	2	24.3578
Vg1	Nur	2	21.6182	21.6845	RP18	Nur	2	24.9864	24.6721	2.98756	-0.663926	0.631158
Vg1	Carb	3	22.175		RP18	Pro	3	25.9421
Vg1	Carb	3	22.0682		RP18	Pro	3	25.9159
Vg1	Carb	3	21.9439	22.0623	RP18	Pro	3	25.7502	25.8694	3.80702	0.227311	1.17065											2.48863
Vg1	Pro	3	21.4104		RP18	Carb	3	24.1101
Vg1	Pro	3	21.205		RP18	Carb	3	24.0775
Vg1	Pro	3	21.1091	21.2415	RP18	Carb	3	24.0046	24.0641	2.82256	-0.984468	0.505412
Vg1	Nurse	3	20.2081		RP18	Nurse	3	23.3305
Vg1	Nurse	3	20.0992		RP18	Nurse	3	23.2721
Vg1	Nurse	3	20.151	20.1528	RP18	Nurse		23.2672	23.29	3.13721	-0.669816	0.628587
Vg1	Carb	4	20.6931		RP18	Pro	4	24.2388
Vg1	Carb	4	20.5672	20.6302	RP18	Pro	4	24.1711	24.205	3.57479	-0.00492586	0.996591
Vg1	Pro	4	20.7799		RP18	Carb	4	23.3684
Vg1	Pro	4	20.7024	20.7412	RP18	Carb	4	23.2693	23.3189	2.5777	-0.99709	0.501009
Vg1	Nur	4	21.7349		RP18	Nur	4	22.4998
Vg1	Nur	4	21.6691	21.702	RP18	Nur	4	22.461	22.4804	0.778381	-2.7964	0.143946
Vg1	Carb	5	21.73		RP18	Pro	5	25.1481
Vg1	Carb	5	21.3484	21.5392	RP18	Pro	5	25.1565	25.1523	3.61311	0.0333959	1.02342
Vg1	Pro	5	21.3829		RP18	Carb	5	24.2008
Vg1	Pro	5	21.222	21.3024	RP18	Carb	5	24.2194	24.2101	2.90763	-0.705473	0.613241
Vg1	Nur	5	20.1359		RP18	Nur	5	21.204
Vg1	Nur	5	19.9276	20.0318	RP18	Nur	5	21.2308	21.2174	1.18566	-2.42745	0.185894

## Sheet: Vg2
											Ave Carb	-4.82827
Vg2	C	1	27.2837		RP18	C	1	21.882							Carb	Pro	Nur
Vg2	C	1	27.1308	27.2072	RP18	C	1	21.6639	21.773	-5.43425	-0.605983	0.657024		Rep 1	0.657024	1.63016	1.04867
Vg2	P	1	26.9193		RP18	P	1	22.187						Rep 2	1.37426	0.842645	1.40418		Source	DF	Sum of Squares	Mean Square	F Ratio	Prob > F
Vg2	P	1	26.7939	26.8566	RP18	P	1	22.0677	22.1274	-4.72924	0.705018	1.63016		Rep 3	0.788525	1.04689	0.51209		Column 1	2	0.259773	0.129887	0.6327	0.548
Vg2	N	1	25.4013		RP18	N	1	20.0259						Rep 4	1.35824	0.274912	0.0864881		Error	12	2.4636	0.2053
Vg2	N	1	25.3705	25.3859	RP18	N	1	20.0145	20.0202	-5.36569	0.0685656	1.04867		Rep 5	1.03408	0.680584	0.55335		C. Total	14	2.72337
														Ave	1.04243	0.89504	0.720956
														Std dev	0.325164	0.49919	0.511972
Vg2	Carb	2	29.5603		RP18	Carb	2	25.0775						Std Error	0.145418	0.223245	0.228961
Vg2	Carb	2	29.2153	29.3878	RP18	Carb	2	24.9589	25.0182	-4.36961	0.45866	1.37426
Vg2	Pro	2	27.8324		RP18	Pro	2	23.2306
Vg2	Pro	2	27.8331	27.8327	RP18	Pro	2	23.2016	23.2161	-4.61661	-0.247003	0.842645
Vg2	Nur	2	28.5468		RP18	Nur	2	24.3578
Vg2	Nur	2	28.5572	28.552	RP18	Nur	2	24.9864	24.6721	-3.87988	0.489728	1.40418
Vg2	Carb	3	31.1989		RP18	Pro	3	25.9421
Vg2	Carb	3	30.9928		RP18	Pro	3	25.9159
Vg2	Carb	3	30.9295	31.0404	RP18	Pro	3	25.7502	25.8694	-5.17104	-0.342772	0.788525
Vg2	Pro	3	29.1554		RP18	Carb	3	24.1101
Vg2	Pro	3	29.194		RP18	Carb	3	24.0775
Vg2	Pro	3	29.1575	29.169	RP18	Carb	3	24.0046	24.0641	-5.10493	0.0661144	1.04689
Vg2	Nurse	3	29.0941		RP18	Nurse	3	23.3305
Vg2	Nurse	3	29.0426		RP18	Nurse	3	23.2721
Vg2	Nurse	3	30.1428	29.4265	RP18	Nurse	3	23.2672	23.29	-6.13657	-0.965531	0.51209
Vg2	Carb	4	28.6379		RP18	Pro	4	24.2388
Vg2	Carb	4	28.5451	28.5915	RP18	Pro	4	24.1711	24.205	-4.38653	0.441741	1.35824
Vg2	Pro	4	29.5957		RP18	Carb	4	23.3684
Vg2	Pro	4	29.541	29.5683	RP18	Carb	4	23.2693	23.3189	-6.24949	-1.86296	0.274912
Vg2	Nur	4	30.522		RP18	Nur	4	22.4998
Vg2	Nur	4	30.2745	30.3983	RP18	Nur	4	22.461	22.4804	-7.91788	-3.53135	0.0864881
Vg1	Carb	5	29.8768		RP18	Pro	5	25.1481
Vg1	Carb	5	29.9877	29.9322	RP18	Pro	5	25.1565	25.1523	-4.77992	0.0483538	1.03408
Vg1	Pro	5	29.8683		RP18	Carb	5	24.2008
Vg1	Pro	5	29.222	29.5451	RP18	Carb	5	24.2194	24.2101	-5.33507	-0.555155	0.680584
Vg1	Nur	5	26.6836		RP18	Nur	5	21.204
Vg1	Nur	5	27.0186	26.8511	RP18	Nur	5	21.2308	21.2174	-5.63365	-0.853737	0.55335

## Sheet: Vg3
										Carb ave	-4.54762
Vg3	Carb	1	25.9643		RP18	Carb	1	21.882							Carb	Pro	Nurse
Vg3	Carb	1	25.9114	25.9379	RP18	Carb	1	21.6639	21.773	-4.16488	0.382741	1.30382		Rep 1	1.30382	1.312	1.49882
Vg3	Pro	1	25.8769		RP18	Pro	1	22.187						Rep 2	1.32169	0.278163	0.440114		Source	DF	Sum of Squares	Mean Square	F Ratio	Prob > F
Vg3	Pro	1	25.924	25.9005	RP18	Pro	1	22.0677	22.1274	-3.77311	0.39177	1.312		Rep 3	0.80105	0.436495	0.416172		Column 1	2	0.437813	0.218907	1.3335	0.3
Vg3	Nur	1	24.4783		RP18	Nur	1	21.0259						Rep 4	0.693655	0.44834	0.59957		Error	12	1.96996	0.164163
Vg3	Nur	1	24.7243	24.6013	RP18	Nur	1	21.0145	21.0202	-3.58106	0.583824	1.49882		Rep 5	1.04436	0.912425	0.326152		C. Total	14	2.40777
														Ave	1.03291	0.677485	0.656165
														Std dev	0.28538	0.426571	0.481261
Vg3	Carb	2	29.2285		RP18	Carb	2	25.0775						Std Error	0.127626	0.190768	0.215226
Vg3	Carb	2	29.0985	29.1635	RP18	Carb	2	24.9589	25.0182	-4.14524	0.402382	1.32169
Vg3	Pro	2	29.1334		RP18	Pro	2	23.2306
Vg3	Pro	2	29.2813	29.2074	RP18	Pro	2	23.2016	23.2161	-5.99124	-1.846	0.278163
Vg3	Nur	2	29.8536		RP18	Nur	2	24.3578
Vg3	Nur	2	30.1491	30.0014	RP18	Nur	2	24.9864	24.6721	-5.32929	-1.18405	0.440114
Vg3	Carb	3	30.8368		RP18	Pro	3	25.9421
Vg3	Carb	3	30.7486		RP18	Pro	3	25.9159
Vg3	Carb	3	30.6257	30.737	RP18	Pro	3	25.7502	25.8694	-4.86766	-0.320036	0.80105
Vg3	Pro	3	30.1328		RP18	Carb	3	24.1101
Vg3	Pro	3	30.2133		RP18	Carb	3	24.0775
Vg3	Pro	3	30.0369	30.1277	RP18	Carb	3	24.0046	24.0641	-6.06362	-1.19596	0.436495
Vg3	Nurse	3	30.7465		RP18	Nurse	3	24.3305
Vg3	Nurse	3	30.4299		RP18	Nurse	3	24.2721
Vg3	Nurse	3	30.0907	30.4224	RP18	Nurse	3	24.2672	24.29	-6.13241	-1.26475	0.416172
Vg3	Carb For	4	30.737		RP18	Carb For	4	25.33
Vg3	Carb For	4	30.959		RP18	Carb For	4	25.914
Vg3	Carb For	4	30.4	30.6987	RP18	Carb For	4	25.626	25.6233	-5.07533	-0.52771	0.693655
Vg3	Pro For	4	30.875		RP18	Pro For	4	24.418
Vg3	Pro For	4	30.567		RP18	Pro For	4	24.461
Vg3	Pro For	4	30.546	30.6627	RP18	Pro For	4	24.411	24.43	-6.23267	-1.15733	0.44834
Vg3	Nurse	4	30.498		RP18	Nurse	4	24.038
Vg3	Nurse	4	30.413		RP18	Nurse	4	24.989
Vg3	Nurse	4	30.523	30.478	RP18	Nurse	4	24.967	24.6647	-5.81333	-0.738	0.59957
Vg1	Carb	5	29.3802		RP18	Pro	5	25.1481
Vg1	Carb	5	29.8945	29.6373	RP18	Pro	5	25.1565	25.1523	-4.485	0.0626232	1.04436
Vg1	Pro	5	28.6529		RP18	Carb	5	24.2008
Vg1	Pro	5	29.0017	28.8273	RP18	Carb	5	24.2194	24.2101	-4.61722	-0.132221	0.912425
Vg1	Nur	5	27.1349		RP18	Nur	5	21.204
Vg1	Nur	5	27.5028	27.3188	RP18	Nur	5	21.2308	21.2174	-6.10138	-1.61638	0.326152

## Sheet: Vg4
										Carb ave	-0.207595
Vg4	Carb	1	23.0162		RP18	Carb	1	21.882							Carb	Pro	Nur
Vg4	Carb	1	23.0551	23.0357	RP18	Carb	1	21.6639	21.773	-1.26268	-1.05509	0.481267		Rep 1	0.481267	0.693625	0.253075
Vg4	Pro	1	23.9383		RP18	Pro	1	22.187						Rep 2	1.81668	1.07682	1.93415		Source	DF	Sum of Squares	Mean Square	F Ratio	Prob > F
Vg4	Pro	1	23.8973	23.9178	RP18	Pro	1	22.0677	22.1274	-1.79046	-0.527773	0.693625		Rep 3	1.29217	1.83006	0.656194		Column 1	2	0.32124	0.16062	0.57	0.5801
Vg4	Nur	1	23.1655		RP18	Nur	1	20.0259						Rep 4	0.970219	1.06887	0.835319		Error	12	3.3812	0.281767
Vg4	Nur	1	23.3651	23.2653	RP18	Nur	1	20.0145	20.0202	-3.24505	-1.98236	0.253075		Rep 5	0.912314	1.18725	0.466726		C. Total	14	3.70244
														Ave	1.09453	1.17132	0.829093
														Std dev	0.496315	0.41286	0.654635
Vg4	Carb	2	24.1008		RP18	Carb	2	25.0775						SEM	0.221959	0.184637	0.292762
Vg4	Carb	2	24.6282	24.3645	RP18	Carb	2	24.9589	25.0182	0.653713	0.861307	1.81668
Vg4	Pro	2	22.4124		RP18	Pro	2	23.2306
Vg4	Pro	2	22.4988	22.4556	RP18	Pro	2	23.2016	23.2161	0.760488	0.106775	1.07682
Vg4	Nur	2	23.1101		RP18	Nur	2	24.3578
Vg4	Nur	2	23.0233	23.0667	RP18	Nur	2	24.9864	24.6721	1.60541	0.951699	1.93415
Vg4	Carb	3	25.8438		RP18	Pro	3	25.9421
Vg4	Carb	3	25.6697		RP18	Pro	3	25.9159
Vg4	Carb	3	25.6079	25.7072	RP18	Pro	3	25.7502	25.8694	0.162203	0.369798	1.29217
Vg4	Pro	3	23.3684		RP18	Carb	3	24.1101
Vg4	Pro	3	23.2674		RP18	Carb	3	24.0775
Vg4	Pro	3	22.4541	23.03	RP18	Carb	3	24.0046	24.0641	1.0341	0.871892	1.83006
Vg4	Nurse	3	22.0056		RP18	Nurse	3	21.3305
Vg4	Nurse	3	21.2218		RP18	Nurse	3	21.2721
Vg4	Nurse	3	21.9792	21.7356	RP18	Nurse	3	21.2672	21.29	-0.445601	-0.607805	0.656194
Vg4	Carb	4	23.4395		RP18	Pro	4	23.1481
Vg4	Carb	4	23.3676	23.4035	RP18	Pro	4	23.1565	23.1523	-0.251213	-0.0436182	0.970219
Vg4	Pro	4	23.364		RP18	Carb	4	23.2008
Vg4	Pro	4	23.3664	23.3652	RP18	Carb	4	23.2194	23.2101	-0.155131	0.0960814	1.06887
Vg4	Nur	4	22.7187		RP18	Nur	4	22.204
Vg4	Nur	4	22.7378	22.7282	RP18	Nur	4	22.2308	22.2174	-0.510813	-0.2596	0.835319
Vg1	Carb	5	25.6802		RP18	Pro	5	25.1481
Vg1	Carb	5	25.3044	25.4923	RP18	Pro	5	25.1565	25.1523	-0.339992	-0.132397	0.912314
Vg1	Pro	5	24.3829		RP18	Carb	5	24.2008
Vg1	Pro	5	24.222	24.3024	RP18	Carb	5	24.2194	24.2101	-0.0923654	0.247626	1.18725
Vg1	Nur	5	23.0259		RP18	Nur	5	21.204
Vg1	Nur	5	22.2876	22.6568	RP18	Nur	5	21.2308	21.2174	-1.43934	-1.09935	0.466726
