# Supplementary material for: Expression analysis of vitellogenins in the workers of the red imported fire ant (Solenopsis invicta)
Source: PeerJ. 2018 May 28;6:e4875. doi: 10.7717/peerj.4875 (PMC5978388; doi:10.7717/peerj.4875)
Supplement: Supplemental Information 3 — Raw and analyzed qPCR data for each Vg gene in control, acetone treated and JH analog treated ants. [file peerj-06-4875-s003.xlsx]

## Sheet: Sheet1
Replicate	Gene	Sample	CT	Ct Mean
1	Vg1	C	19.0989		RPL18	C	21.8007							C	A	H
1	Vg1	C	18.9542	19.0266	RPL18	C	21.7132	21.7569	2.73038	0.251784	1.19068		Rep1	1.19068	0.810979	1.08801
1	Vg1	A	18.3318		RPL18	A	20.7675						Rep2	1.50982	0.552708	2.11313
1	Vg1	A	18.2548	18.2933	RPL18	A	20.6753	20.7214	2.42812	-0.302264	0.810979		Rep 3	1.28469	0.770228	0.913719
1	Vg1	H	18.3101		RPL18	H	21.1303						Rep4	0.407681	1.13218	1.07158
1	Vg1	H	18.2942	18.3022	RPL18	H	21.1782	21.1543	2.85208	0.121696	1.08801		Rep5	1.01159	0.647298	0.724276
													Rep6	1.04992	0.707165	0.898484
2	Vg1	C	18.4693		RPL18	C	21.5117						Ave	1.07573	0.770093	1.13487
2	Vg1	C	18.2985	18.3839	RPL18	C	21.402	21.4569	3.07298	0.594378	1.50982		Std Dev	0.373198	0.199537	0.497308
2	Vg1	A	19.1768		RPL18	A	21.4571						Stderr	0.152357	0.0814607	0.203025
2	Vg1	A	19.2434	19.2101	RPL18	A	21.3982	21.4276	2.21757	-0.855411	0.552708
2	Vg1	H	18.9538		RPL18	H	23.0541
2	Vg1	H	18.9589	18.9563	RPL18	H	23.1633	23.1087	4.15236	1.07938	2.11313
3	Vg1	C	16.2838		RP18	C	19.137
3	Vg1	C	16.2468	16.2653	RP18	C	19.0737	19.1054	2.84002	0.361421	1.28469
3	Vg1	A	17.854		RP18	A	20.2177
3	Vg1	A	17.6937	17.7738	RP18	A	20.2567	20.2372	2.46338	-0.376642	0.770228
3	Vg1	H	17.0716		RP18	H	19.843
3	Vg1	H	17.0433	17.0575	RP18	H	19.6916	19.7673	2.70984	-0.130178	0.913719
4	Vg1	C	19.3875		RPL18	C	20.6276
4	Vg1	C	19.3253	19.3564	RPL18	C	20.4534	20.5405	1.18411	-1.29449	0.407681
4	Vg1	A	19.2822		RPL18	A	20.486
4	Vg1	A	19.1897	19.2359	RPL18	A	20.7123	20.5991	1.36322	0.179107	1.13218
4	Vg1	H	20.3648		RPL18	H	21.3144							Source	DF	Sum of Squares	Mean Square	F Ratio	Prob > F
4	Vg1	H	20.3143	20.3395	RPL18	H	21.9323	21.6234	1.28385	0.0997343	1.07158			Column 1	2	0.460328	0.230164	1.6199	0.2307
														Error	15	2.13127	0.142085
5	Vg1	C	20.5638		RPL18	C	23.2058							C. Total	17	2.5916
5	Vg1	C	20.8042	20.684	RPL18	C	23.1526	23.1792	2.49522	0.0166211	1.01159
5	Vg1	A	18.0005		RPL18	A	20.0113
5	Vg1	A	18.2395	18.12	RPL18	A	19.9641	19.9877	1.86772	-0.627499	0.647298
5	Vg1	H	19.0473		RPL18	H	21.1231
5	Vg1	H	19.1023	19.0748	RPL18	H	21.0862	21.1047	2.02983	-0.465389	0.724276
6	Vg1	C	18.3971		RPL18	C	20.9679
6	Vg1	C	18.1399	18.2685	RPL18	C	20.6668	20.8174	2.54888	0.0702809	1.04992
6	Vg1	A	18.1513		RPL18	A	20.2949
6	Vg1	A	18.2192	18.1852	RPL18	A	20.1736	20.2342	2.049	-0.499881	0.707165
6	Vg1	H	18.3955		RPL18	H	20.9217
6	Vg1	H	18.5767	18.4861	RPL18	H	20.8394	20.8806	2.39444	-0.154436	0.898484
						Ave con	2.4786
1	Vg2	C	26.1767		RPL18	C	21.8007							C	A	H
1	Vg2	C	26.161	26.1688	RPL18	C	21.7132	21.7569	-4.4119	0.588436	1.50362		Rep1	1.50362	0.448314	1.08896
1	Vg2	A	26.2543		RPL18	A	20.7675						Rep2	0.524734	0.652921	0.836303
1	Vg2	A	26.3272	26.2907	RPL18	A	20.6753	20.7214	-5.56932	-1.15742	0.448314		Rep 3	1.96367	0.542609	0.661808
1	Vg2	H	25.3296		RPL18	H	21.1303						Rep4	0.785897	0.903207	0.946051
1	Vg2	H	25.5568	25.4432	RPL18	H	21.1782	21.1543	-4.28895	0.122951	1.08896		Rep5	1.04474	1.27578	1.31991
													Rep6	0.78611	0.873697	0.88776
2	Vg2	C	27.5783		RPL18	C	21.5117						Ave	1.10146	0.782755	0.956798
2	Vg2	C	27.1968	27.3875	RPL18	C	21.402	21.4569	-5.93068	-0.930343	0.524734		Std Dev	0.536655	0.300743	0.226157
2	Vg2	A	27.9883		RPL18	A	21.4571						Stderr	0.219088	0.122778	0.0923282
2	Vg2	A	27.9584	27.9733	RPL18	A	21.3982	21.4276	-6.5457	-0.61502	0.652921
2	Vg2	H	29.4866		RPL18	H	23.6541
2	Vg2	H	29.708	29.5973	RPL18	H	23.1633	23.4087	-6.18858	-0.257902	0.836303
3	Vg2	C	23.1912		RP18	C	19.137
3	Vg2	C	23.0731	23.1321	RP18	C	19.0737	19.1054	-4.02678	0.973553	1.96367
3	Vg2	A	25.0297		RP18	A	20.2177
3	Vg2	A	25.2623	25.146	RP18	A	20.2567	20.2372	-4.9088	-0.882014	0.542609
3	Vg2	H	24.4233		RP18	H	19.843
3	Vg2	H	24.3559	24.3896	RP18	H	19.6916	19.7673	-4.6223	-0.595514	0.661808
4	Vg2	C	25.8184		RPL18	C	20.6276
4	Vg2	C	25.9584	25.8884	RPL18	C	20.4534	20.5405	-5.34792	-0.347587	0.785897						Source	DF	Sum of Squares	Mean Square	F Ratio	Prob > F
4	Vg2	A	26.0622		RPL18	A	20.486										Column 1	2	0.305937	0.152969	1.068	0.3684
4	Vg2	A	26.1257	26.0939	RPL18	A	20.7123	20.5991	-5.49479	-0.146871	0.903207						Error	15	2.14835	0.143224
4	Vg2	H	26.476		RPL18	H	21.3144										C. Total	17	2.45429
4	Vg2	H	26.8266	26.6513	RPL18	H	21.1323	21.2234	-5.42793	-0.0800104	0.946051
5	Vg2	C	26.2803		RPL18	C	21.2058
5	Vg2	C	25.9525	26.1164	RPL18	C	21.1526	21.1792	-4.9372	0.0631377	1.04474
5	Vg2	A	25.5865		RPL18	A	21.0113
5	Vg2	A	25.5606	25.5735	RPL18	A	20.9641	20.9877	-4.58582	0.35138	1.27578
5	Vg2	H	25.6978		RPL18	H	21.1231
5	Vg2	H	25.585	25.6414	RPL18	H	21.0862	21.1047	-4.53676	0.400437	1.31991
6	Vg2	C	26.1131		RPL18	C	20.9679
6	Vg2	C	26.2167	26.1649	RPL18	C	20.6668	20.8174	-5.34753	-0.347196	0.78611
6	Vg2	A	26.001		RPL18	A	20.2949
6	Vg2	A	25.9522	25.9766	RPL18	A	20.5736	20.4342	-5.54233	-0.194796	0.873697
6	Vg2	H	26.5976		RPL18	H	20.9217
6	Vg2	H	26.2021	26.3999	RPL18	H	20.8394	20.8806	-5.51929	-0.171759	0.88776
							Ave con	-5.00034
1	Vg3	C	30.1		RPL18	C	21.8007
1	Vg3	C	30.6886	30.3943	RPL18	C	21.7132	21.7569	-8.63736	0.482689	1.39735			C	A	H
1	Vg3	A	30.3222		RPL18	A	20.7675						Rep1	1.39735	0.570643	1.36588
1	Vg3	A	30.0141	30.1681	RPL18	A	20.6753	20.7214	-9.4467	-0.80934	0.570643		Rep2	1.63583	0.707254	1.23678
1	Vg3	H	29.3432		RPL18	H	21.1303						Rep 3	1.22581	0.662732	0.940077
1	Vg3	H	29.3403	29.3418	RPL18	H	21.1782	21.1543	-8.18753	0.449833	1.36588		Rep4	0.4999	1.02434	1.01891
													Rep5	0.580378	1.25628	0.987424
2	Vg3	C	29.962		RPL18	C	21.5117						Rep6	1.2301	0.955246	1.3257
2	Vg3	C	29.7718	29.8669	RPL18	C	21.402	21.4569	-8.41003	0.710023	1.63583		Ave	1.09489	0.862748	1.1458
2	Vg3	A	29.8795		RPL18	A	21.4571						Std Dev	0.455687	0.260401	0.185788
2	Vg3	A	30.7953	30.3374	RPL18	A	21.3982	21.4276	-8.90973	-0.499701	0.707254		Stderr	0.186033	0.106308	0.0758474
2	Vg3	H	31.5555		RPL18	H	23.6541
2	Vg3	H	31.4688	31.5121	RPL18	H	23.1633	23.4087	-8.10344	0.30659	1.23678
3	Vg3	C	28.056		RP18	C	19.137
3	Vg3	C	27.8074	27.9317	RP18	C	19.0737	19.1054	-8.82631	0.293736	1.22581
3	Vg3	A	29.9465		RP18	A	20.2177
3	Vg3	A	29.3675	29.657	RP18	A	20.2567	20.2372	-9.41982	-0.593502	0.662732
3	Vg3	H	28.8244		RP18	H	19.843
3	Vg3	H	28.5411	28.6828	RP18	H	19.6916	19.7673	-8.91546	-0.0891495	0.940077
4	Vg3	C	30.8648		RPL18	C	20.6276						Source	DF	Sum of Squares	Mean Square	F Ratio	Prob > F
4	Vg3	C	30.4569	30.6608	RPL18	C	20.4534	20.5405	-10.1203	-1.00029	0.4999		Column 1	2	0.278137	0.139069	1.3382	0.2919
4	Vg3	A	30.7898		RPL18	A	20.486						Error	15	1.55888	0.103925
4	Vg3	A	30.5798	30.6848	RPL18	A	20.7123	20.5991	-10.0857	0.0346878	1.02434		C. Total	17	1.83702
4	Vg3	H	30.9908		RPL18	H	21.3144
4	Vg3	H	31.6426	31.3167	RPL18	H	21.1323	21.2234	-10.0933	0.0270296	1.01891
5	Vg3	C	31.1653		RPL18	C	21.2058
5	Vg3	C	31.003	31.0842	RPL18	C	21.1526	21.1792	-9.90499	-0.784936	0.580378
5	Vg3	A	30.8327		RPL18	A	21.0113
5	Vg3	A	30.2944	30.5635	RPL18	A	20.9641	20.9877	-9.57583	0.329156	1.25628
5	Vg3	H	31.1019		RPL18	H	21.1231
5	Vg3	H	30.9539	31.0279	RPL18	H	21.0862	21.1047	-9.92325	-0.0182585	0.987424
6	Vg3	C	29.9354		RPL18	C	20.9679
6	Vg3	C	29.3419	29.6387	RPL18	C	20.6668	20.8174	-8.82127	0.298776	1.2301
6	Vg3	A	29.2746		RPL18	A	20.2949
6	Vg3	A	29.3685	29.3216	RPL18	A	20.5736	20.4342	-8.88733	-0.0660555	0.955246
6	Vg3	H	29.1812		RPL18	H	20.9217
6	Vg3	H	29.409	29.2951	RPL18	H	20.8394	20.8806	-8.41452	0.406759	1.3257
							Ave con	-9.12005
1	Vg4	C	22.6741		RPL18	C	21.8007							C	A	H
1	Vg4	C	22.6744	22.6742	RPL18	C	21.7132	21.7569	-0.917304	0.920261	1.89246		Rep1	1.89246	0.579194	0.819078
1	Vg4	A	22.4016		RPL18	A	20.7675						Rep2	2.18501	0.327441
1	Vg4	A	22.4516	22.4266	RPL18	A	20.6753	20.7214	-1.70519	-0.787882	0.579194		Rep 3	0.791373	0.825115	1.01737
1	Vg4	H	22.3721		RPL18	H	21.1303						Rep4	0.552715	1.08117	0.759021
1	Vg4	H	22.3469	22.3595	RPL18	H	21.1782	21.1543	-1.20523	-0.287927	0.819078		Rep5	0.829339	1.67828	1.01827
													Rep6	0.666661	0.831224	1.05517
2	Vg4	C	22.1347		RPL18	C	21.5117						Ave	1.15293	0.88707	0.933781
2	Vg4	C	22.1989	22.1668	RPL18	C	21.402	21.4569	-0.709923	1.12764	2.18501		Std Dev	0.699178	0.46446	0.134683
2	Vg4	A	23.7886		RPL18	A	21.4571						Stderr	0.285438	0.189615	0.060232
2	Vg4	A	23.708	23.7483	RPL18	A	21.3982	21.4276	-2.32062	-1.61069	0.327441
2	Vg4	H	31.8229		RPL18	H	23.6541
2	Vg4	H	32.8327	32.3278	RPL18	H	23.1633	23.4087	-8.91911	-8.20919	0.00337899
3	Vg4	C	21.3539		RP18	C	19.137
3	Vg4	C	21.207	21.2805	RP18	C	19.0737	19.1054	-2.17513	-0.33757	0.791373
3	Vg4	A	22.7865		RP18	A	20.2177
3	Vg4	A	22.5929	22.6897	RP18	A	20.2567	20.2372	-2.45247	-0.277332	0.825115
3	Vg4	H	21.9385		RP18	H	19.843
3	Vg4	H	21.8967	21.9176	RP18	H	19.6916	19.7673	-2.15029	0.0248432	1.01737		Source	DF	Sum of Squares	Mean Square	F Ratio	Prob > F
								-1.26745					Column 1	2	0.235712	0.117856	0.4581	0.6416
4	Vg4	C	23.1684		RPL18	C	20.6276						Error	14	3.60187	0.257276
4	Vg4	C	23.2985	23.2334	RPL18	C	20.4534	20.5405	-2.69296	-0.855392	0.552715		C. Total	16	3.83758
4	Vg4	A	23.1851		RPL18	A	20.486
4	Vg4	A	23.1739	23.1795	RPL18	A	20.7123	20.5991	-2.58036	0.112593	1.08117
4	Vg4	H	24.35		RPL18	H	21.3144
4	Vg4	H	24.2783	24.3141	RPL18	H	21.1323	21.2234	-3.09075	-0.397788	0.759021
5	Vg4	C	23.5206		RPL18	C	21.2058
5	Vg4	C	23.0529	23.2867	RPL18	C	21.1526	21.1792	-2.10753	-0.269966	0.829339
5	Vg4	A	22.2843		RPL18	A	21.0113
5	Vg4	A	22.4122	22.3483	RPL18	A	20.9641	20.9877	-1.36055	0.746982	1.67828
5	Vg4	H	23.1814		RPL18	H	21.1231
5	Vg4	H	23.1908	23.1861	RPL18	H	21.0862	21.1047	-2.08141	0.0261202	1.01827
6	Vg4	C	23.2085		RPL18	C	20.9679
6	Vg4	C	23.2713	23.2399	RPL18	C	20.6668	20.8174	-2.42254	-0.584975	0.666661
6	Vg4	A	23.0063		RPL18	A	20.2949
6	Vg4	A	23.2406	23.1235	RPL18	A	20.5736	20.4342	-2.68923	-0.26669	0.831224
6	Vg4	H	23.279		RPL18	H	20.9217
6	Vg4	H	23.1722	23.2256	RPL18	H	20.8394	20.8806	-2.34507	0.0774734	1.05517
							Ave con	-1.83756
